# Supplementary material for: Rapid and stable complexation of the α-generators bismuth-212 and lead-212 with a tetraazamacrocyclic chelator bearing thiosemicarbazone pendant arms
Source: Royal Society of Chemistry journal article supplement (doi:10.1039/d4qi01338g), 2024-01-01
Supplement: d4qi01338g1.pdf [file d4qi01338g1.pdf]

## Electronic Supplementary Information

# Rapid and stable complexation of the $\alpha$ -generators bismuth-212 and lead-212 with a tetraazamacrocyclic chelator bearing thiosemicarbazone pendant arms

Melyssa L. Grieve,<sup>a,b</sup> Patrick R. W. J. Davey,<sup>c</sup> Paul V. Bernhardt,<sup>d</sup> Craig M. Forsyth<sup>a</sup> and Brett M.  
Paterson<sup>\*b,d</sup>

<sup>a</sup>School of Chemistry, Monash University, Clayton, VIC 3800, Australia.

<sup>b</sup>Centre for Advanced Imaging, Australian Institute for Bioengineering and Nanotechnology, The University of Queensland, Brisbane, QLD 4072, Australia

<sup>c</sup>Department of Chemistry, Simon Fraser University, Burnaby, BCV5A 1S6, Canada.

<sup>d</sup>School of Chemistry and Molecular Biosciences, The University of Queensland, Brisbane, QLD 4072, Australia.

\*Corresponding author: [brett.paterson@uq.edu.au](mailto:brett.paterson@uq.edu.au)

## Table of Contents

|                                                                                                                                                                                                                                                                                                                                                                                                                                                           |    |
|-----------------------------------------------------------------------------------------------------------------------------------------------------------------------------------------------------------------------------------------------------------------------------------------------------------------------------------------------------------------------------------------------------------------------------------------------------------|----|
| <b>Figure S1</b> The $^1\text{H}$ NMR spectra of $[\text{Bi}(\text{DOTS})](\text{BPh}_4)$ in $d_6$ -DMSO at 373 K. ....                                                                                                                                                                                                                                                                                                                                   | 4  |
| <b>Figure S2</b> The $^1\text{H}$ NMR spectra of $[\text{Bi}(\text{DOTS})](\text{BPh}_4)$ in $d_6$ -DMSO at 298 K (bottom), 318 K, 338 K, 358 K and 373 K (top). ....                                                                                                                                                                                                                                                                                     | 4  |
| <b>Figure S3</b> The $^1\text{H}$ NMR spectra from 5 - 10.5 ppm of $\text{H}_2\text{DOTS}$ (top), $[\text{Bi}(\text{DOTS})](\text{BPh}_4)$ (middle) and $[\text{Pb}(\text{H}_2\text{DOTS})](\text{OAc})_x(\text{BPh}_4)_y$ (bottom) in $d_6$ -DMSO at 298 K. ....                                                                                                                                                                                         | 5  |
| <b>Figure S4</b> The $^{13}\text{C}\{^1\text{H}\}$ NMR spectra of $[\text{Bi}(\text{DOTS})](\text{BPh}_4)$ in $d_6$ -DMSO at 373 K. ....                                                                                                                                                                                                                                                                                                                  | 5  |
| <b>Figure S5</b> The $^{13}\text{C}$ - $^1\text{H}$ HSQC spectra of $[\text{Bi}(\text{DOTS})](\text{BPh}_4)$ in $d_6$ -DMSO at 373 K. The red color shows the proton-carbon correlations in $-\text{CH}-$ and $-\text{CH}_3$ groups while the blue color shows the proton-carbon correlations in $-\text{CH}_2-$ groups. ....                                                                                                                             | 6  |
| <b>Figure S7</b> The $^1\text{H}$ NMR spectra of $[\text{Pb}(\text{H}_2\text{DOTS})](\text{OAc})_x(\text{BPh}_4)_y$ in $d_6$ -DMSO at 298 K (bottom), 323 K, 348 K and 373 K (top). ....                                                                                                                                                                                                                                                                  | 7  |
| <b>Figure S8</b> The $^{13}\text{C}\{^1\text{H}\}$ NMR spectra of $[\text{Pb}(\text{H}_2\text{DOTS})](\text{OAc})_x(\text{BPh}_4)_y$ in $d_6$ -DMSO at 373 K. ....                                                                                                                                                                                                                                                                                        | 7  |
| <b>Figure S9</b> The $^{13}\text{C}$ - $^1\text{H}$ HSQC spectra of $[\text{Pb}(\text{H}_2\text{DOTS})](\text{OAc})_x(\text{BPh}_4)_y$ in $d_6$ -DMSO at 373 K. The red color shows the proton-carbon correlations in $-\text{CH}-$ and $-\text{CH}_3$ groups while the blue color shows the proton-carbon correlations in $-\text{CH}_2-$ groups. ....                                                                                                   | 8  |
| <b>Figure S10</b> The high-resolution mass spectrum (ESI $^+$ ) of $[\text{Bi}(\text{DOTS})]^+$ ....                                                                                                                                                                                                                                                                                                                                                      | 8  |
| <b>Figure S11</b> The high-resolution mass spectrum (ESI $^+$ ) of $[\text{Pb}(\text{H}_2\text{DOTS}) - \text{H}^+]^+$ ....                                                                                                                                                                                                                                                                                                                               | 9  |
| <b>Figure S12</b> RP-HPLC (280 nm) of $[\text{Bi}(\text{DOTS})]^+$ ....                                                                                                                                                                                                                                                                                                                                                                                   | 9  |
| <b>Figure S13</b> RP-HPLC (254 nm) of $[\text{Pb}(\text{H}_2\text{DOTS})]^{2+}$ ....                                                                                                                                                                                                                                                                                                                                                                      | 9  |
| <b>Figure S17</b> (A) Time course of the UV-visible absorbance spectra of $[\text{Bi}(\text{DOTS})]^+$ in the presence of 100 equivalents of $\text{H}_5\text{DTPA}$ in 30% DMSO/ 0.5 M acetate buffer (pH 5) after 0, 6, 8, 16 and 45 days (approximately 84% of the $[\text{Bi}(\text{DOTS})]^+$ complex remained intact after 45 days). (B) Plot of the change in absorbance at 376 nm vs. time. Inset: Fit of the data to a first order process. .... | 12 |
| <b>Figure S18</b> Plot of the change in absorbance at 376 nm vs. time of the UV-visible absorbance spectra of $[\text{Bi}(\text{DOTS})]^+$ in the presence of 1000 equivalents of $\text{H}_5\text{DTPA}$ in 20% DMSO/0.02 M MOPS buffer (pH 7.4) (approximately 61% of the $[\text{Bi}(\text{DOTS})]^+$ complex remained intact after 18 days). Inset: Fit of the data to a first order process. ....                                                    | 13 |
| <b>Figure S19</b> Plot of the change in absorbance at 325 nm vs. time of the UV-visible absorbance spectra of a solution of $[\text{Pb}(\text{H}_2\text{DOTS})]^{2+}$ in the presence of 1000 equivalents of $\text{H}_5\text{DTPA}$ in 30% DMSO/0.02 M MOPS buffer (pH 7.4) at 25 $^\circ\text{C}$ . Spectra obtained at 30 sec intervals. Inset: Fit of the data to a first order process. ....                                                         | 13 |
| <b>Figure S20</b> Plot of the change in absorbance at 325 nm vs. time of the UV-visible absorbance spectra of a solution of $[\text{Pb}(\text{H}_2\text{DOTS})]^{2+}$ in the presence of 100 equivalents of $\text{H}_4\text{EDTA}$ in 1% DMSO/pH 7.4 MOPS buffer at 25 $^\circ\text{C}$ . Spectra obtained at 1 min intervals. Inset: Fit of the data to a first order process. ....                                                                     | 14 |
| <b>Figure S21</b> The gamma spectrum of $^{212}\text{Pb}$ in transient equilibrium with daughter radionuclides (red) and purified $^{212}\text{Bi}$ (blue). Significant peaks are labelled with energy (keV) and radionuclide to which they are assigned. ....                                                                                                                                                                                            | 16 |
| <b>Figure S22.</b> Representative radioTLC chromatograms with a 50 mM EDTA mobile phase: A) $^{212}\text{Pb}][\text{Pb}(\text{H}_2\text{DOTS})]^{2+}$ ; B) $^{212}\text{Pb}][\text{Pb}(\text{H}_2\text{DOTS})]^{2+}$ and $^{212}\text{Pb}][\text{Pb}^{2+}$ ; C) $^{212}\text{Pb}][\text{Pb}^{2+}$ and; D) $^{212}\text{Pb}][\text{Pb}^{2+}]$ after incubation in serum for 24 h. ....                                                                     | 18 |
| <b>Figure S23.</b> Representative radioTLC chromatograms with a 50 mM EDTA mobile phase: A) $^{212}\text{Bi}][\text{Bi}(\text{DOTS})]^+$ and; B) $^{212}\text{Bi}][\text{Bi}^{3+}]$ . ....                                                                                                                                                                                                                                                                | 18 |
| <b>Table S1</b> Crystallographic and refinement data for $[\text{Bi}(\text{DOTS})](\text{BPh}_4)$ and $[\text{Pb}(\text{H}_2\text{DOTS})](\text{BPh}_4)_2 \cdot 2\text{DMSO}$ ....                                                                                                                                                                                                                                                                        | 10 |
| <b>Table S2</b> Calculated $\square G$ (kcal/mol) for complex formation reactions at the BP86-D3/def2-TZVP/IEFPCM( $\text{H}_2\text{O}$ ) level of theory. ....                                                                                                                                                                                                                                                                                           | 15 |
| <b>Table S3</b> Natural Bond Orbital Analysis of the Pb $6s^2$ lone pair in $[\text{Pb}(\text{H}_2\text{DOTS})]^{2+}$ ....                                                                                                                                                                                                                                                                                                                                | 15 |

|                                                                                                                                                                                                                                                                                                               |    |
|---------------------------------------------------------------------------------------------------------------------------------------------------------------------------------------------------------------------------------------------------------------------------------------------------------------|----|
| <b>Table S4</b> The characteristic $\gamma$ -rays produced on decay of $^{212}\text{Pb}$ , $^{212}\text{Bi}$ and $^{208}\text{Tl}$ . <sup>[66-67]</sup> Values <1% probability omitted.....                                                                                                                   | 16 |
| <b>Table S5</b> The RCC values for $^{212}\text{Pb}^{2+}$ with $\text{H}_2\text{DOTS}$ , $\text{H}_4\text{TCMC}$ , $\text{H}_4\text{DOTA}$ and $\text{H}_4\text{DOTP}$ at different ligand concentrations ( $10^{-3}$ - $10^{-7}$ M) and pH 7.4 (0.1 M HEPES pH 7.4) over 30 min at ambient temperature. .... | 16 |
| <b>Table S6</b> The RCC achieved by incubation of $^{212}\text{Pb}^{2+}$ with $\text{H}_2\text{DOTS}$ and $\text{H}_4\text{DOTP}$ under different ligand concentrations ( $10^{-3}$ - $10^{-7}$ M) at pH 5.5 (0.8 M $\text{NH}_4\text{OAc}$ pH 5.5) over 30 min at ambient temperature. ....                  | 17 |
| <b>Table S7</b> The RCC achieved by incubation of $^{212}\text{Bi}^{3+}$ 1:1 0.1 M HCl: 0.1 M NaI with $\text{H}_2\text{DOTS}$ and $\text{H}_2\text{DOTP}$ under different ligand concentrations at pH 5.5 (0.8 M $\text{NH}_4\text{OAc}$ pH 5.5) over 10 min at ambient temperature. ....                    | 17 |
| <b>Table S8</b> The RCC achieved by incubation of $^{212}\text{Pb}^{2+}$ with $\text{H}_2\text{DOTS}$ at a ligand concentration of $10^{-4}$ M at pH 5.5 (0.8 M $\text{NH}_4\text{OAc}$ pH 5.5) and pH 7.4 (0.1 M HEPES pH 7.4) over 0 - 30 min at ambient temperature. ....                                  | 17 |

## Structure Characterisation

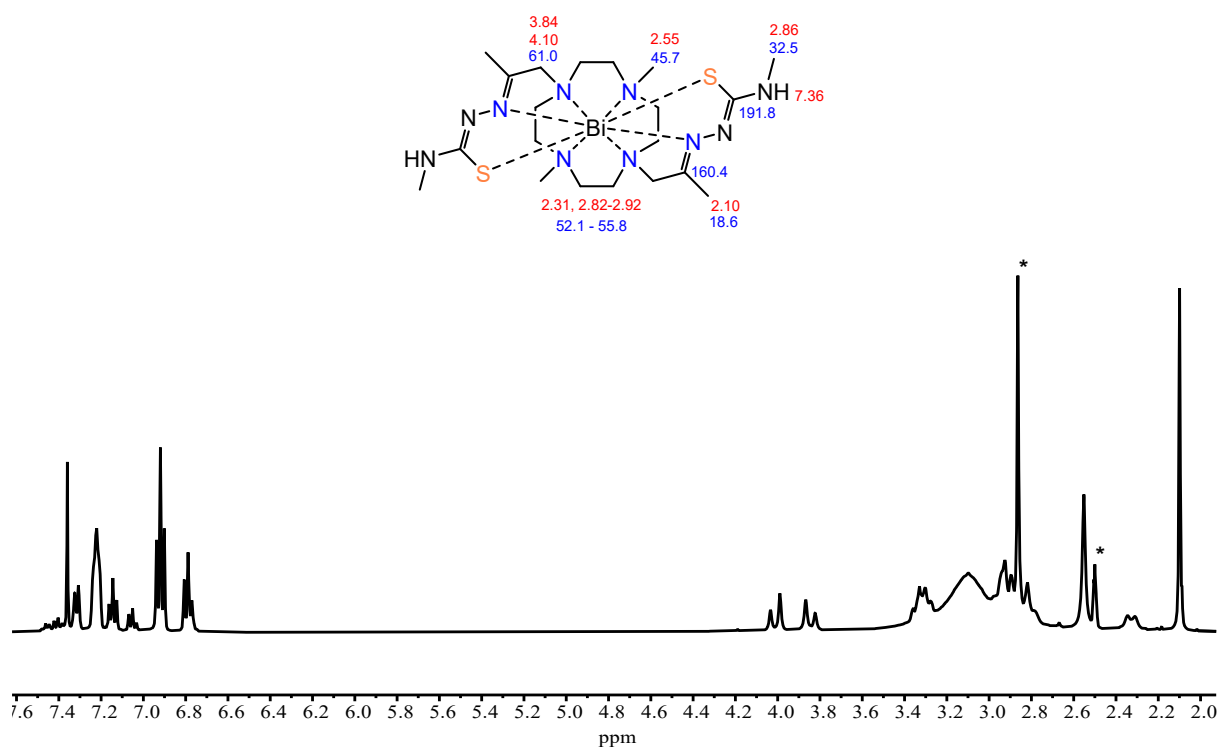

**Figure S1** The <sup>1</sup>H NMR spectra of [Bi(DOTS)](BPh<sub>4</sub>) in *d*<sub>6</sub>-DMSO at 373 K.

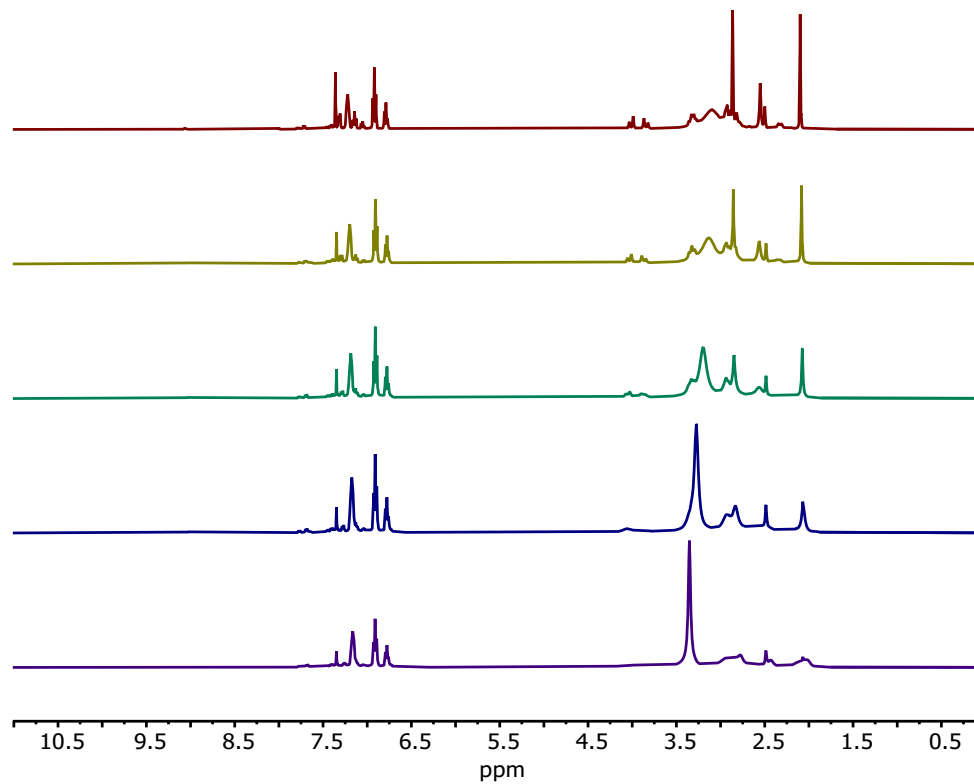

**Figure S2** The <sup>1</sup>H NMR spectra of [Bi(DOTS)](BPh<sub>4</sub>) in *d*<sub>6</sub>-DMSO at 298 K (bottom), 318 K, 338 K, 358 K and 373 K (top).

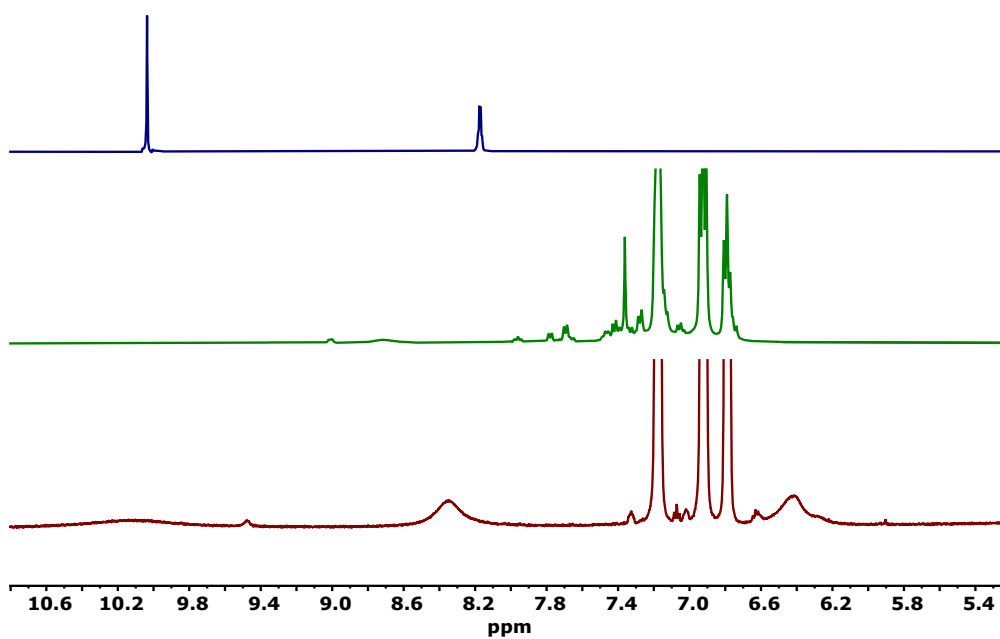

**Figure S3** The  $^1\text{H}$  NMR spectra from 5 - 10.7 ppm of  $\text{H}_2\text{DOTS}$  (top),  $[\text{Bi}(\text{DOTS})](\text{BPh}_4)$  (middle) and  $[\text{Pb}(\text{H}_2\text{DOTS})](\text{OAc})_x(\text{BPh}_4)_y$  (bottom) in  $d_6$ -DMSO at 298 K.

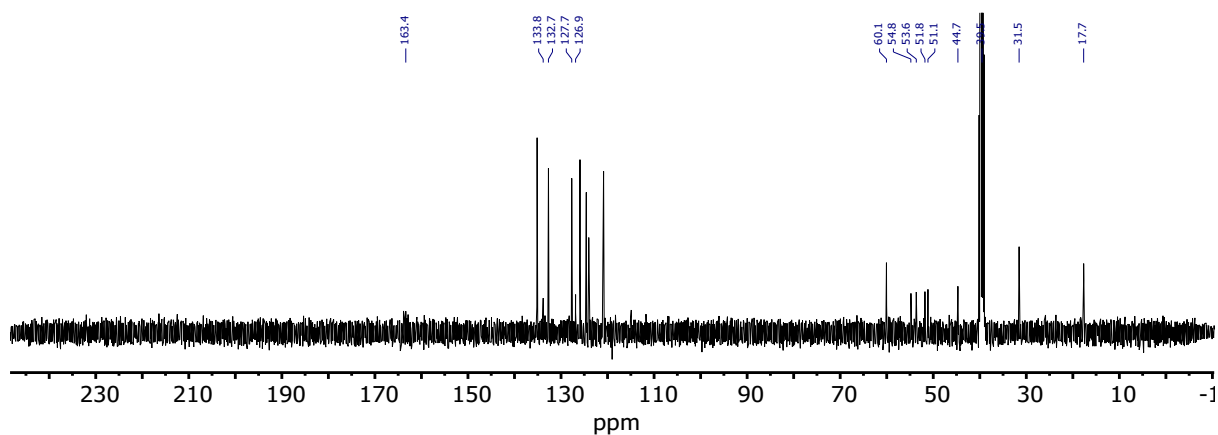

**Figure S4** The  $^{13}\text{C}\{^1\text{H}\}$  NMR spectra of  $[\text{Bi}(\text{DOTS})](\text{BPh}_4)$  in  $d_6$ -DMSO at 373 K.

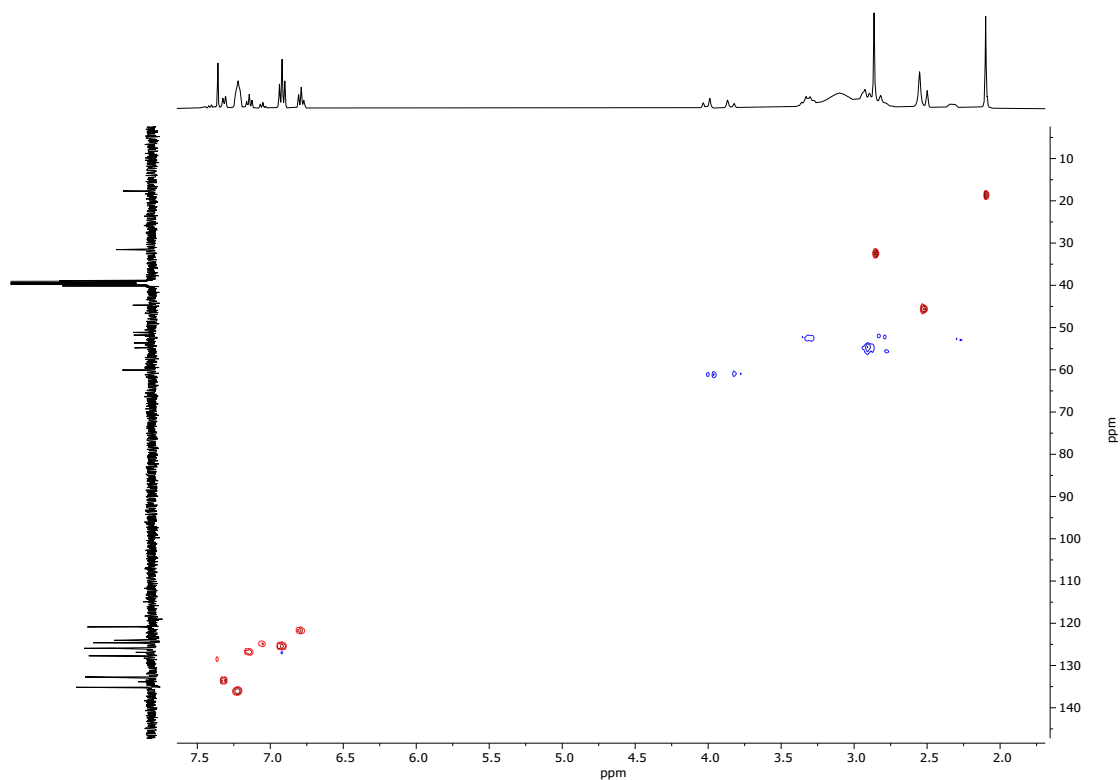

**Figure S5** The  $^{13}\text{C}$ - $^1\text{H}$  HSQC spectra of  $[\text{Bi}(\text{DOTS})](\text{BPh}_4)$  in  $d_6$ -DMSO at 373 K. The red color shows the proton-carbon correlations in  $-\text{CH}-$  and  $-\text{CH}_3$  groups while the blue color shows the proton-carbon correlations in  $-\text{CH}_2-$  groups.

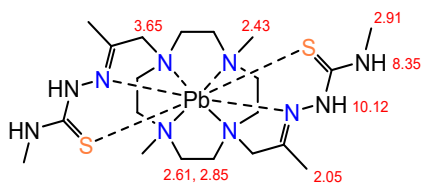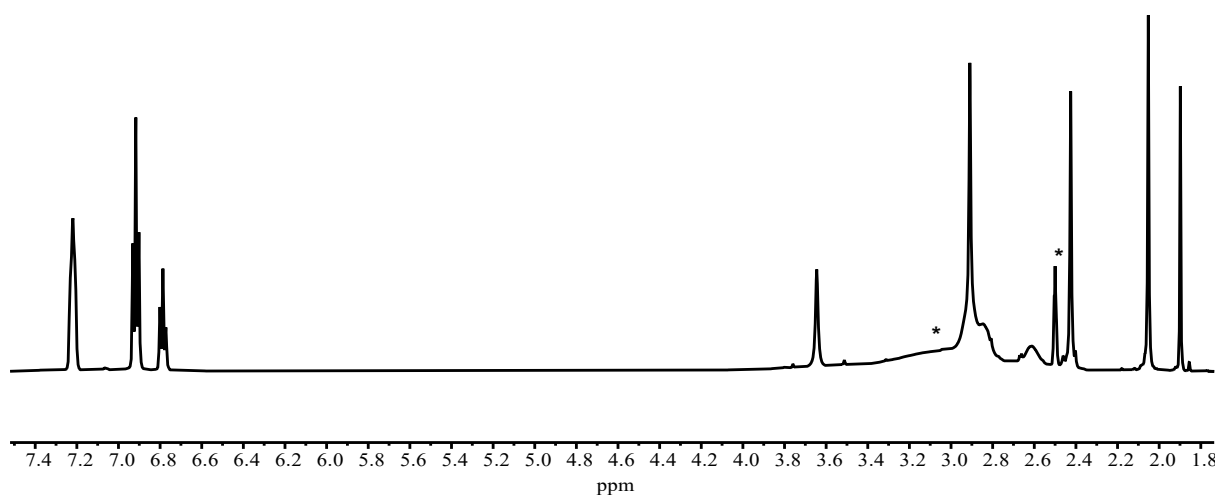

**Figure S6** The  $^1\text{H}$  NMR spectra of  $[\text{Pb}(\text{H}_2\text{DOTS})](\text{OAc})_x(\text{BPh}_4)_y$  in  $d_6$ -DMSO at 373 K.

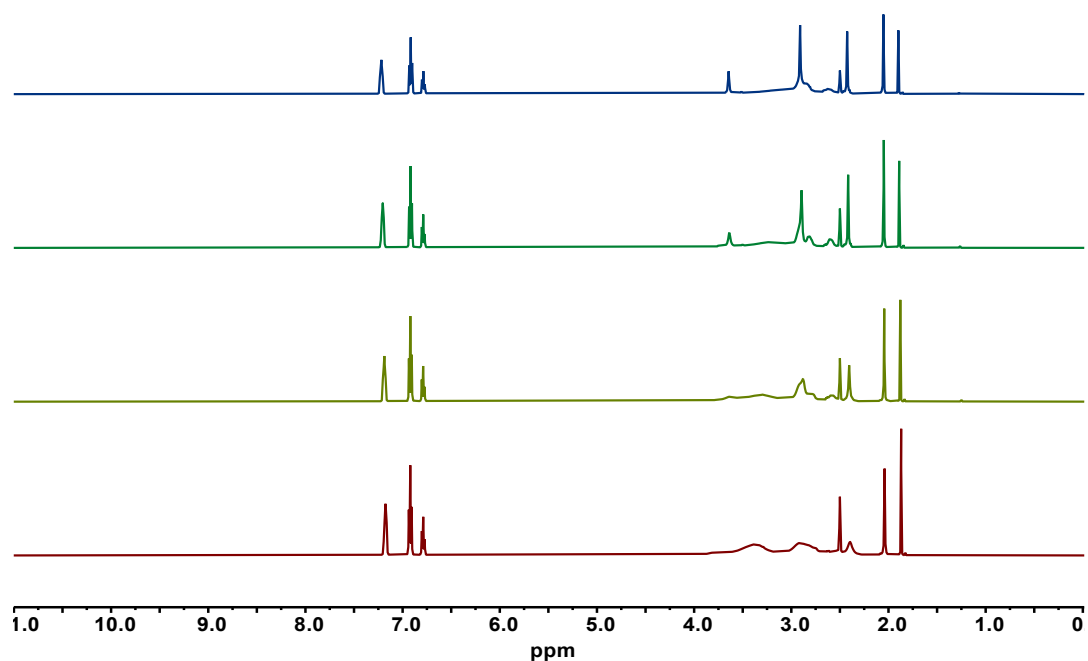

**Figure S7** The  $^1\text{H}$  NMR spectra of  $[\text{Pb}(\text{H}_2\text{DOTS})](\text{OAc})_x(\text{BPh}_4)_y$  in  $d_6$ -DMSO at 298 K (bottom), 323 K, 348 K and 373 K (top).

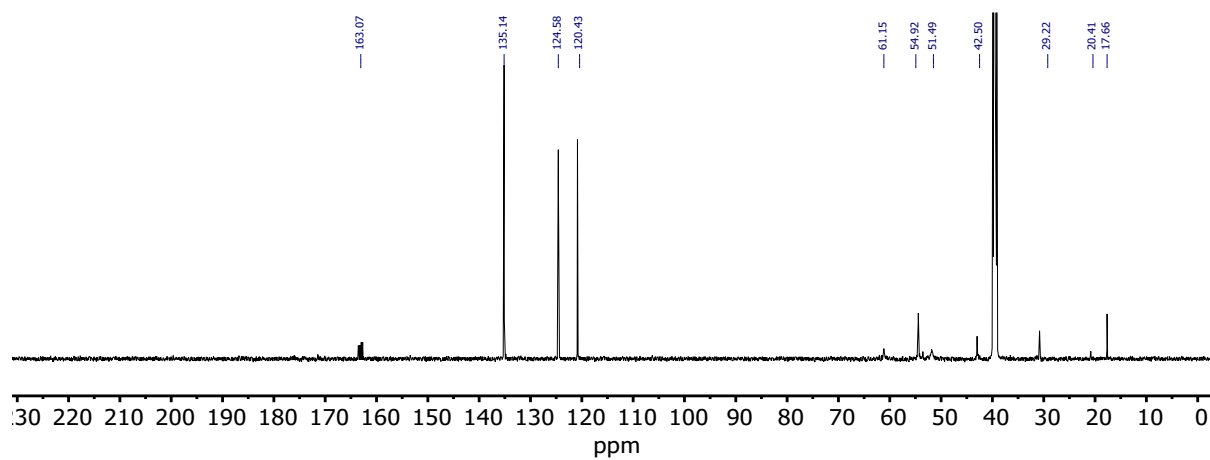

**Figure S8** The  $^{13}\text{C}\{^1\text{H}\}$  NMR spectra of  $[\text{Pb}(\text{H}_2\text{DOTS})](\text{OAc})_x(\text{BPh}_4)_y$  in  $d_6$ -DMSO at 373 K.

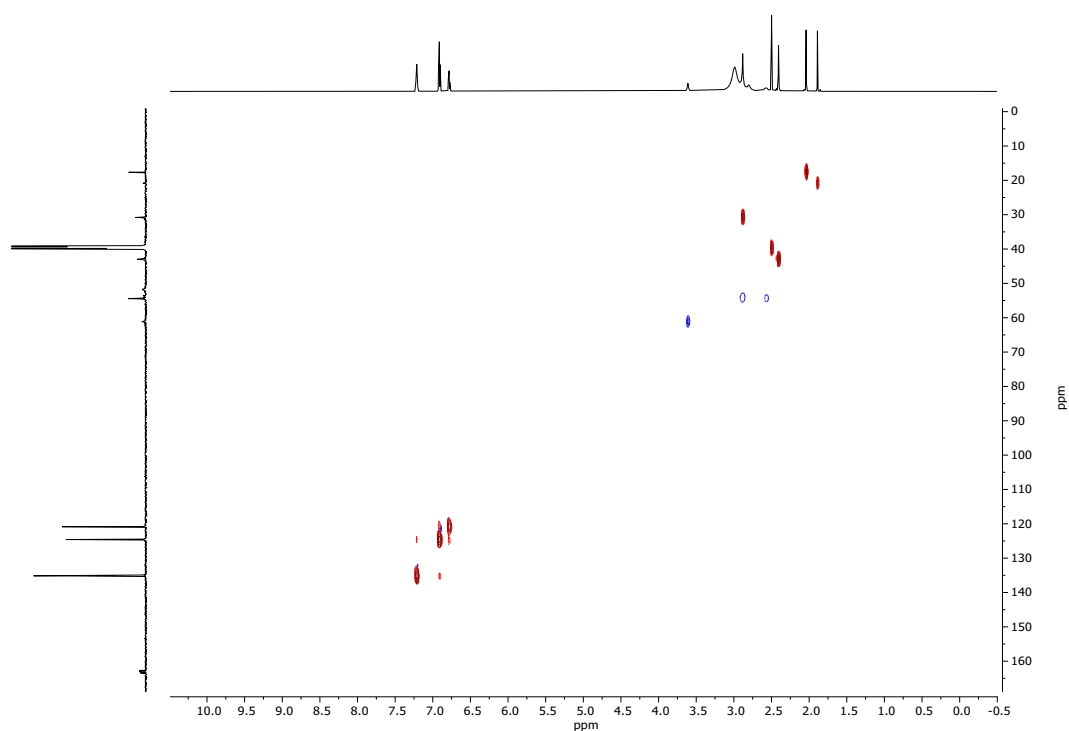

**Figure S9** The  $^{13}\text{C}$ - $^1\text{H}$  HSQC spectra of  $[\text{Pb}(\text{H}_2\text{DOTS})](\text{OAc})_x(\text{BPh}_4)_y$  in  $d_6$ -DMSO at 373 K. The red color shows the proton-carbon correlations in  $-\text{CH}-$  and  $-\text{CH}_3$  groups while the blue color shows the proton-carbon correlations in  $-\text{CH}_2-$  groups.

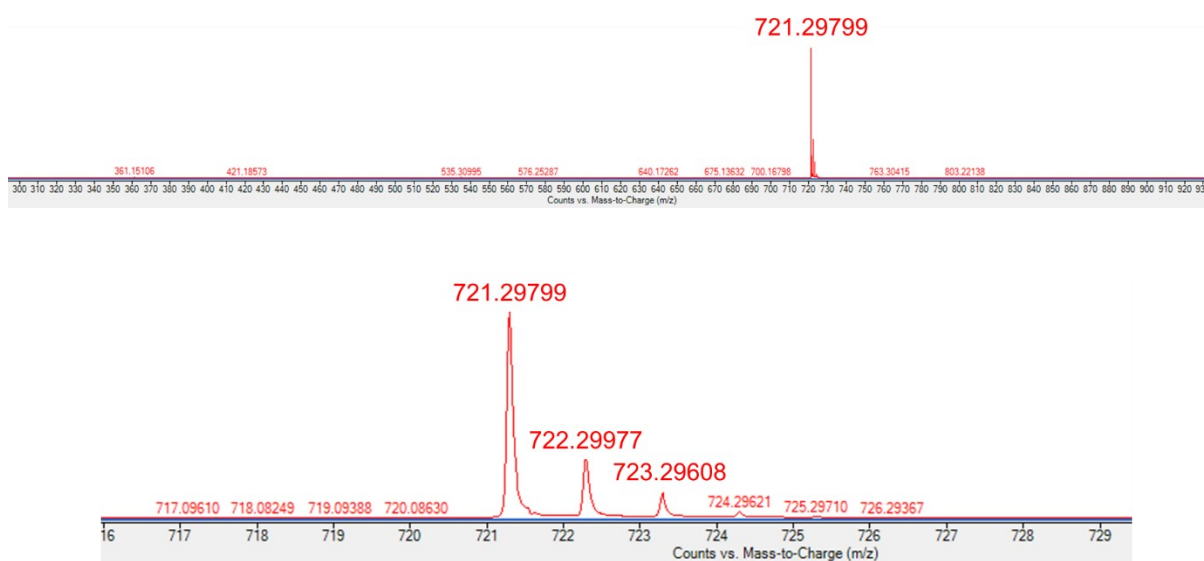

**Figure S10** The high-resolution mass spectrum (ESI<sup>+</sup>) of  $[\text{Bi}(\text{DOTS})]^+$



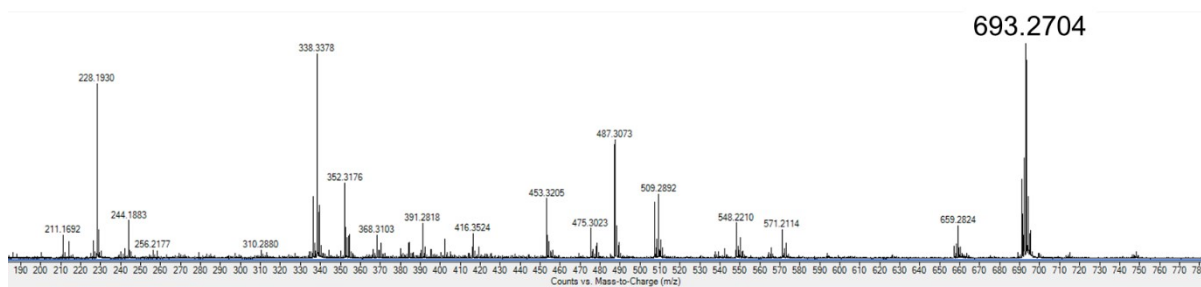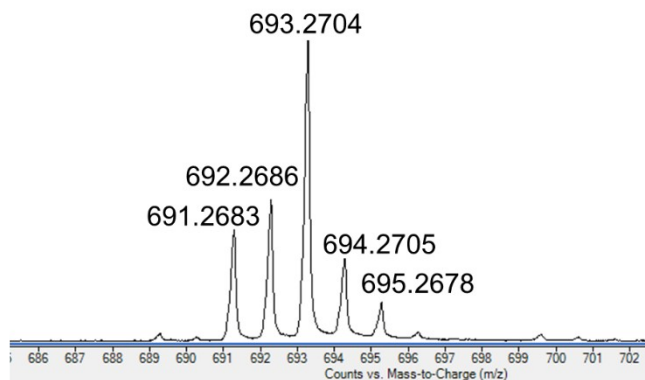

**Figure S11** The high-resolution mass spectrum (ESI<sup>+</sup>) of  $[\text{Pb}(\text{H}_2\text{DOTS}) - \text{H}]^+$

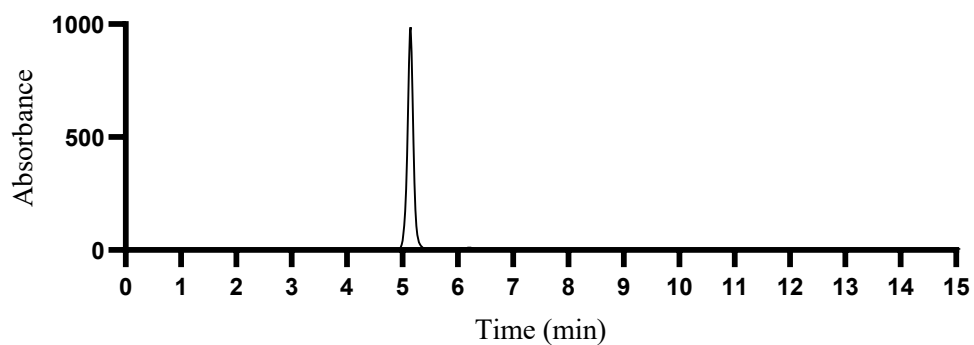

**Figure S12** RP-HPLC ( $\lambda = 280 \text{ nm}$ ) of  $[\text{Bi}(\text{DOTS})]^+$

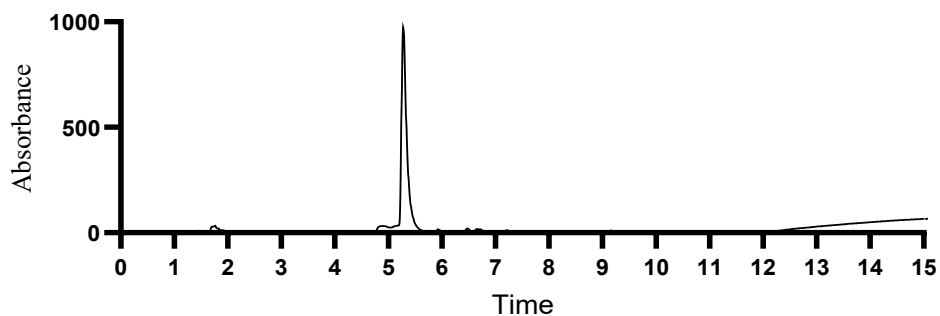

**Figure S13** RP-HPLC ( $\lambda = 254 \text{ nm}$ ) of  $[\text{Pb}(\text{H}_2\text{DOTS})]^{2+}$

**Table S1** Crystallographic and refinement data for [Bi(DOTS)](BPh<sub>4</sub>) and [Pb(H<sub>2</sub>DOTS)](BPh<sub>4</sub>)<sub>2</sub>·2DMSO

| Parameter                                                                       | [Bi(DOTS)](BPh <sub>4</sub> )                                     | [Pb(H <sub>2</sub> DOTS)](BPh <sub>4</sub> ) <sub>2</sub> ·2DMSO                               |
|---------------------------------------------------------------------------------|-------------------------------------------------------------------|------------------------------------------------------------------------------------------------|
| Formula                                                                         | C <sub>44</sub> H <sub>60</sub> BBiN <sub>10</sub> S <sub>2</sub> | C <sub>72</sub> H <sub>90</sub> B <sub>2</sub> PbO <sub>5</sub> N <sub>10</sub> S <sub>4</sub> |
| Formula Weight (Å <sup>3</sup> )                                                | 1014.94                                                           | 1532.58                                                                                        |
| Crystal System                                                                  | Tetragonal                                                        | Monoclinic                                                                                     |
| Space Group                                                                     | <i>I4/m</i>                                                       | <i>P2/n</i>                                                                                    |
| Temperature (K)                                                                 | 123 K                                                             | 190 K                                                                                          |
| <i>a</i> (Å)                                                                    | 12.4557(1)                                                        | 9.9835(5)                                                                                      |
| <i>b</i> (Å)                                                                    | 12.4557(1)                                                        | 13.6709(8)                                                                                     |
| <i>c</i> (Å)                                                                    | 36.8615(8)                                                        | 28.353(1)                                                                                      |
| $\alpha$ (°)                                                                    | 90                                                                | 90                                                                                             |
| $\beta$ (°)                                                                     | 90                                                                | 93.292(4)                                                                                      |
| $\gamma$ (°)                                                                    | 90                                                                | 90                                                                                             |
| <i>V</i> (Å <sup>3</sup> )                                                      | 5718.86                                                           | 3863.3(3)                                                                                      |
| <i>Z</i>                                                                        | 4                                                                 | 2                                                                                              |
| $\rho$ (g cm <sup>-3</sup> )                                                    | 1.179                                                             | 1.317                                                                                          |
| Absorption coefficient ( $\mu$ mm <sup>-1</sup> )                               | 6.995                                                             | 5.671                                                                                          |
| <i>F</i> (000)                                                                  | 2064                                                              | 1576                                                                                           |
| Angle range (°)                                                                 | 3.7050 - 76.6680                                                  | 4.4690 - 55.3700                                                                               |
| Reflections collected                                                           | 15531                                                             | 21216                                                                                          |
| Independent reflections                                                         | 3060 [0.0434]                                                     | 6004 [0.1364]                                                                                  |
| Final R1 values ( <i>I</i> > 2 $\sigma$ ( <i>I</i> ))                           | 0.0355                                                            | 0.0782                                                                                         |
| Final wR1( <i>F</i> <sub>2</sub> ) values ( <i>I</i> > 2 $\sigma$ ( <i>I</i> )) | 0.0903                                                            | 0.1725                                                                                         |
| Final R1 values (all data)                                                      | 0.0378                                                            | 0.1131                                                                                         |
| GOOF                                                                            | 1.084                                                             | 1.028                                                                                          |

## Speciation

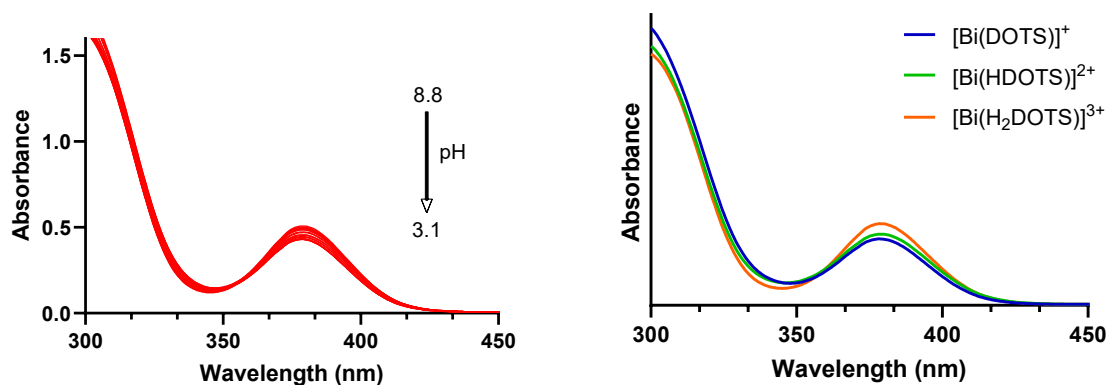

**Figure S14** UV-Visible spectra of  $[\text{Bi}(\text{DOTS})]^+$  over the pH range 3.1 – 8.8 (left). The calculated UV-Visible spectra of each species identified during the pH titration (right). Data analysed using ReactLab EQUILIBRIA.

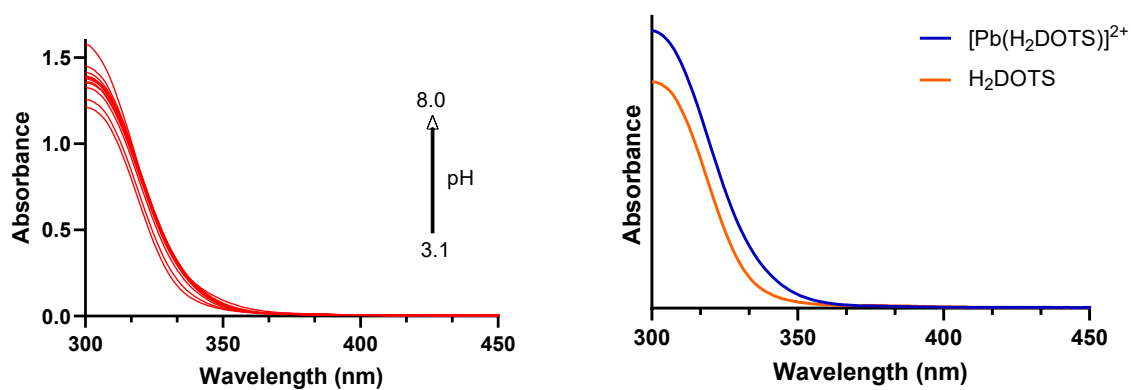

**Figure S15** UV-Visible spectra of  $[\text{Pb}(\text{H}_2\text{DOTS})]^{2+}$  over the pH range 3.1 – 8.0 (left). The calculated UV-Visible spectra of each species identified during the pH titration (right). Data analysed using ReactLab EQUILIBRIA.

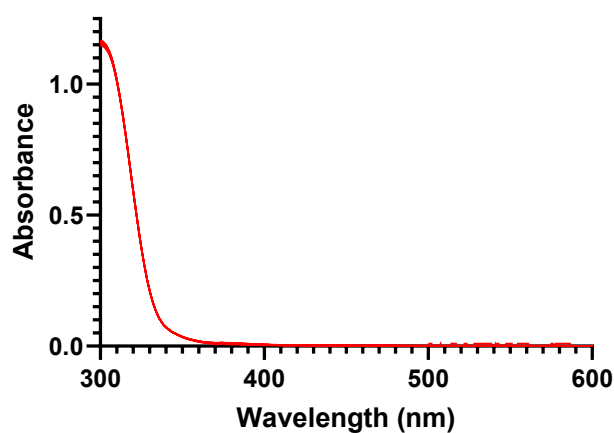

**Figure S16** UV-Visible spectra of  $\text{H}_2\text{DOTS}$  collected over the pH range 3-9.

## Dissociation Kinetics

The kinetic inertness of  $[\text{Bi}(\text{DOTS})]^+$  was tested using a competition against 100 equivalents of  $\text{H}_5\text{DTPA}$  at 25 °C in 30% DMSO in acetate buffer (pH 5) (**Figure S17**).  $[\text{Bi}(\text{DOTS})]^+$  demonstrated exceptional kinetic inertness to the  $\text{H}_5\text{DTPA}$  challenge experiment remaining 100% intact after 4 days and 85% intact after 45 days.

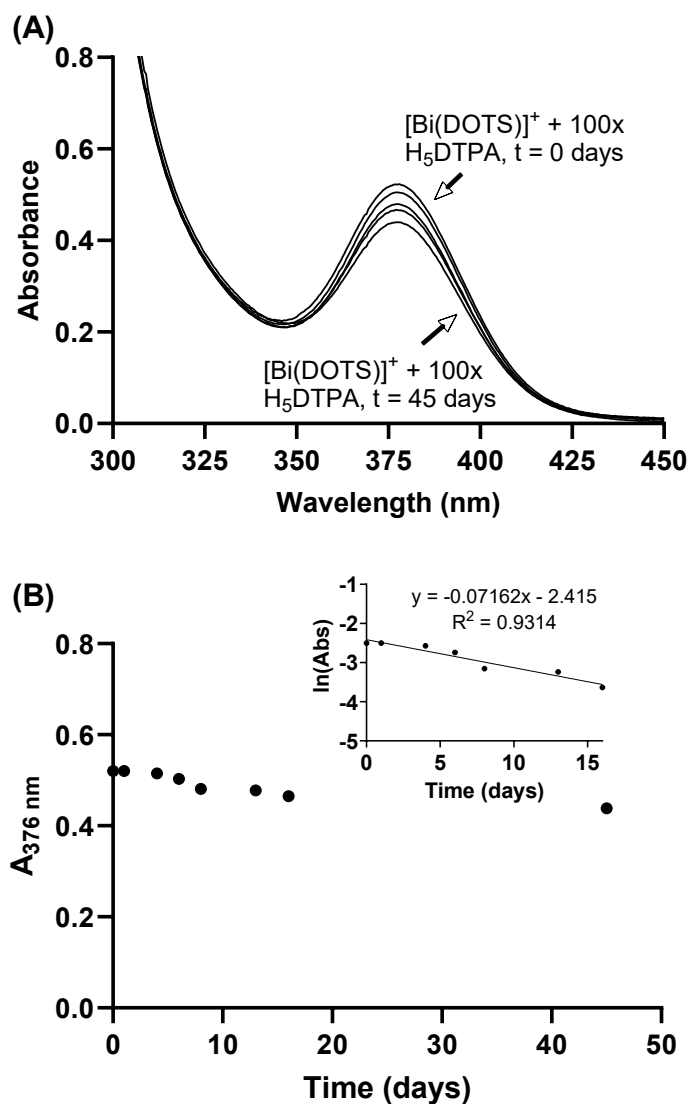

**Figure S17** (A) Time course of the UV-visible absorbance spectra of  $[\text{Bi}(\text{DOTS})]^+$  in the presence of 100 equivalents of  $\text{H}_5\text{DTPA}$  in 30% DMSO/ 0.5 M acetate buffer (pH 5) after 0, 6, 8, 16 and 45 days (approximately 84% of the  $[\text{Bi}(\text{DOTS})]^+$  complex remained intact after 45 days). (B) Plot of the change in absorbance at 376 nm vs. time. Inset: Fit of the data to a first order process.

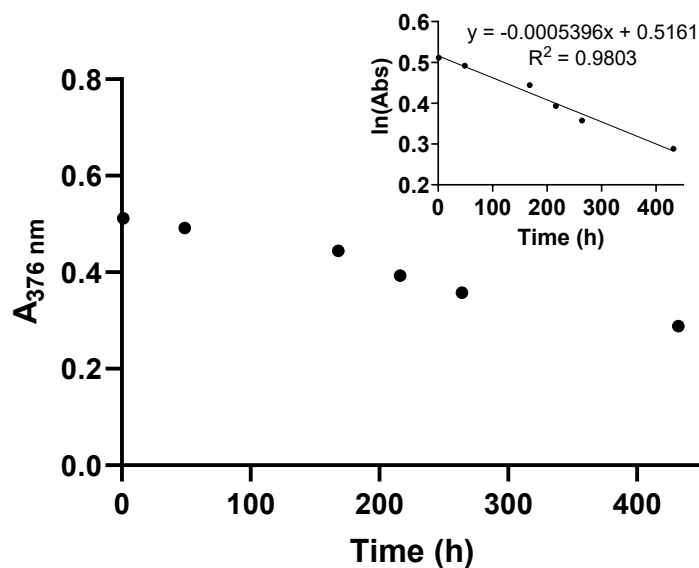

**Figure S18** Plot of the change in absorbance at 376 nm vs. time of the UV-visible absorbance spectra of  $[\text{Bi}(\text{DOTS})]^+$  in the presence of 1000 equivalents of  $\text{H}_3\text{DTPA}$  in 20% DMSO/0.02 M MOPS buffer (pH 7.4) (approximately 61% of the  $[\text{Bi}(\text{DOTS})]^+$  complex remained intact after 18 days). Inset: Fit of the data to a first order process.

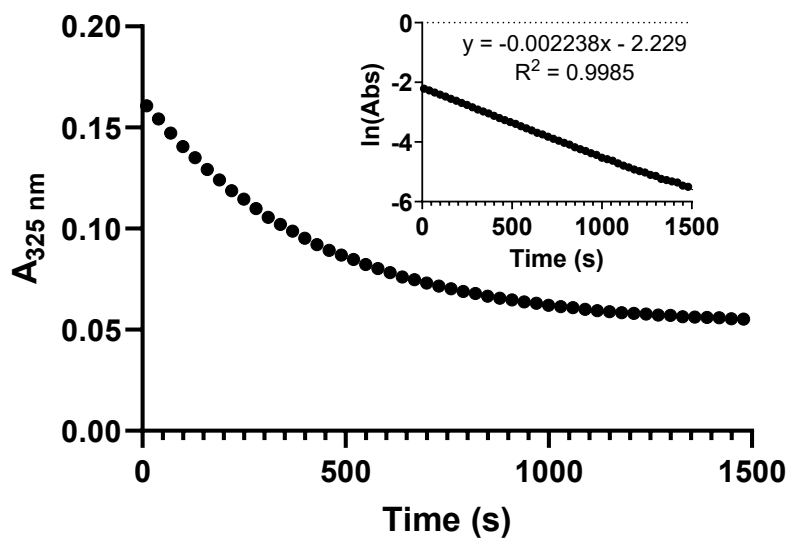

**Figure S19** Plot of the change in absorbance at 325 nm vs. time of the UV-visible absorbance spectra of a solution of  $[\text{Pb}(\text{H}_2\text{DOTS})]^{2+}$  in the presence of 1000 equivalents of  $\text{H}_3\text{DTPA}$  in 30% DMSO/0.02 M MOPS buffer (pH 7.4) at 25 °C. Spectra obtained at 30 sec intervals. Inset: Fit of the data to a first order process.

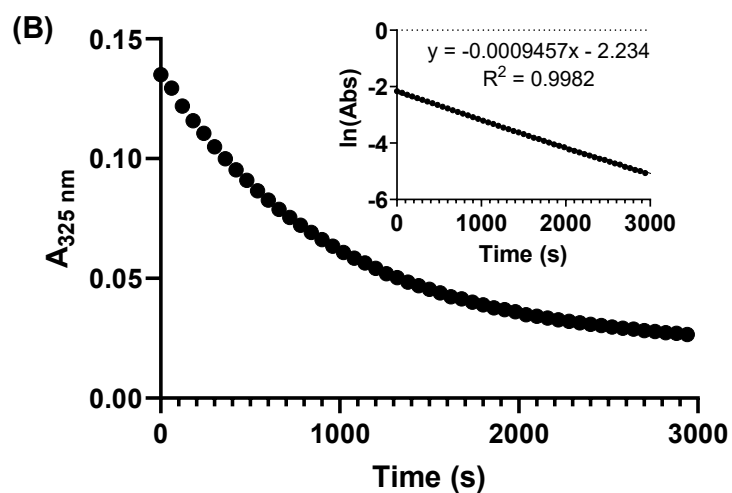

**Figure S20** Plot of the change in absorbance at 325 nm vs. time of the UV-visible absorbance spectra of a solution of  $[\text{Pb}(\text{H}_2\text{DOTS})]^{2+}$  in the presence of 100 equivalents of  $\text{H}_4\text{EDTA}$  in 1% DMSO/pH 7.4 MOPS buffer at 25 °C. Spectra obtained at 1 min intervals. Inset: Fit of the data to a first order process.

## Density Functional Theory Calculations

### Assessing the thermodynamics of [Pb(H<sub>2</sub>DOTS)]<sup>2+</sup> and [Bi(DOTS)]<sup>+</sup>

The relative stabilities of the radiometal complexes, i.e. the Gibbs free energies of the reaction ( $\Delta G$ ) between the H<sub>2</sub>DOTS chelator to Bi<sup>3+</sup> and Pb<sup>2+</sup>, were assessed by density functional theory (DFT) calculations according to the designed equation (1). Under these conditions,  $n$  is the charge of the cation,  $m$  is the charge of the competing ion, and  $x$  is the charge of the ligand in the complexation reactions. For Pb<sup>2+</sup> and Bi<sup>3+</sup>, the hydration number used was 8 based on previously established experimental and theoretical findings of the likely coordination numbers of Pb<sup>2+</sup> and Bi<sup>3+</sup> in water.

### Complex Formation Reactions

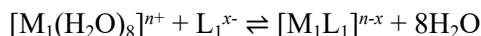

$$\Delta G_1 = G([M_1L_1]^{n-x}) + 8G(H_2O) - G([M_1(H_2O)_8]^{n+}) - G(L_1^{x-}) \quad (1)$$

**Table S2** Calculated  $\Delta G$  (kcal/mol) for complex formation reactions at the BP86-D3/def2-TZVP/IEFPCM(H<sub>2</sub>O) level of theory.

| Complex                                 | DG (kcal/mol) |
|-----------------------------------------|---------------|
| [Pb(H <sub>2</sub> DOTS)] <sup>2+</sup> | -176.51       |
| [Bi(DOTS)] <sup>+</sup>                 | -360.75       |

**Table S3** Natural Bond Orbital Analysis of the Pb 6s<sup>2</sup> lone pair in [Pb(H<sub>2</sub>DOTS)]<sup>2+</sup>

| Complex                                 | Occupancy | Coefficients/Hybrids                                            | Natural Electron Configuration         |
|-----------------------------------------|-----------|-----------------------------------------------------------------|----------------------------------------|
| [Pb(H <sub>2</sub> DOTS)] <sup>2+</sup> | 1.88466   | s(98.96%)<br>p 0.01 (1.03%)<br>d 0.00 (0.01%)<br>f 0.00 (0.00%) | [core]6s(1.90)6p(0.88)6d(0.01)7p(0.04) |

## Radiolabelling

**Table S4** The characteristic  $\gamma$ -rays produced on decay of  $^{212}\text{Pb}$ ,  $^{212}\text{Bi}$  and  $^{208}\text{Tl}$ .<sup>[66-67]</sup> Values <1% probability omitted.

| Radionuclide      | Energy (keV) | Probability (%) |
|-------------------|--------------|-----------------|
| $^{212}\text{Pb}$ | 238.63       | 43.6            |
|                   | 300.09       | 3.2             |
| $^{212}\text{Bi}$ | 39.86        | 1.1             |
|                   | 727.33       | 6.7             |
|                   | 785.37       | 1.1             |
|                   | 1620.74      | 1.5             |
| $^{208}\text{Tl}$ | 277.37       | 6.6             |
|                   | 510.74       | 22.5            |
|                   | 583.19       | 85.0            |
|                   | 763.45       | 1.8             |
|                   | 860.53       | 12.4            |
|                   | 2614.51      | 99.8            |

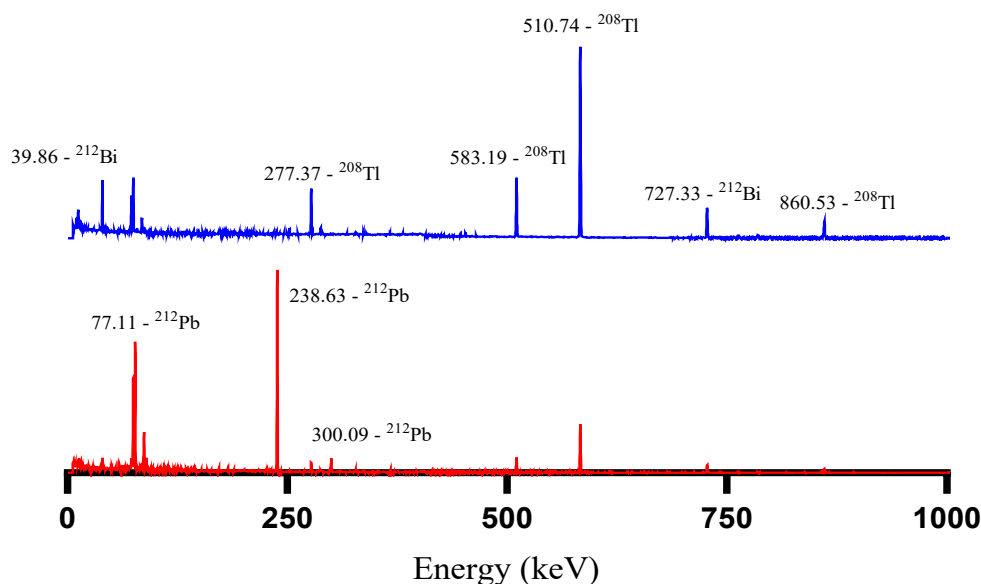

**Figure S21** The gamma spectrum of  $^{212}\text{Pb}$  in transient equilibrium with daughter radionuclides (red) and separated  $^{212}\text{Bi}$  (blue). Significant peaks are labelled with energy (keV) and radionuclide to which they are assigned.

**Table S5** The RCC values for  $^{212}\text{Pb}^{2+}$  with  $\text{H}_2\text{DOTS}$ ,  $\text{H}_4\text{TCMC}$ ,  $\text{H}_4\text{DOTA}$  and  $\text{H}_4\text{DOTP}$  at different ligand concentrations ( $10^{-3}$  -  $10^{-7}$  M) and pH 7.4 (0.1 M HEPES pH 7.4) over 30 min at ambient temperature.

| Concentration | $\text{H}_2\text{DOTS}$ | $\text{H}_4\text{TCMC}^{\text{a}}$ | $\text{H}_4\text{TCMC}^{\text{b}}$ | $\text{H}_4\text{DOTA}^{\text{a}}$ | $\text{H}_4\text{DOTA}^{\text{b}}$ | $\text{H}_4\text{DOTP}$ |
|---------------|-------------------------|------------------------------------|------------------------------------|------------------------------------|------------------------------------|-------------------------|
| $10^{-3}$     | $93.7 \pm 0.4$          | $95.6 \pm 1.4$                     |                                    | $97.9 \pm 1.7$                     |                                    | $95.6 \pm 3.1$          |
| $10^{-4}$     | $98.9 \pm 0.6$          | $98.01 \pm 0.04$                   | $97.8 \pm 0.4$                     | $98.7 \pm 0.4$                     | $97.6 \pm 0.1$                     | $92.9 \pm 6.2$          |
| $10^{-5}$     | $97.4 \pm 1.6$          | $94.6 \pm 3.6$                     | $98.1 \pm 0.5$                     | $89.1 \pm 7.4$                     | $96.5 \pm 0.8$                     | $85.9 \pm 2.9$          |
| $10^{-6}$     | $77.0 \pm 3.9$          | $74.5 \pm 6.1$                     | $80.8 \pm 8.9$                     | $7.9 \pm 0.7$                      | $4.3 \pm 1.2$                      | $19.1 \pm 4.9$          |
| $10^{-7}$     | $5.0 \pm 1.9$           | $3.7 \pm 2.5$                      | $13.9 \pm 1.6$                     | $5.6 \pm 0.8$                      | $3.6 \pm 0.5$                      | $12.7 \pm 13.5$         |

<sup>a</sup>This work. <sup>b</sup>B. L. McNeil, A. K. H. Robertson, W. Fu, H. Yang, C. Hoehr, C. F. Ramogida and P. Schaffer, *EJNMMI Radiopharm. Chem.*, 2021, **6**, 6.



**Table S6** The RCC achieved by incubation of  $^{212}\text{Pb}^{2+}$  with  $\text{H}_2\text{DOTS}$  and  $\text{H}_4\text{DOTP}$  under different ligand concentrations ( $10^{-3}$  -  $10^{-7}$  M) at pH 5.5 (0.8 M  $\text{NH}_4\text{OAc}$  pH 5.5) over 30 min at ambient temperature.

| Concentration | $\text{H}_2\text{DOTS}$ | $\text{H}_4\text{DOTP}$ |
|---------------|-------------------------|-------------------------|
| $10^{-3}$     | $95.9 \pm 1.2$          | $94.6 \pm 3.1$          |
| $10^{-4}$     | $96.2 \pm 0.8$          | $95.0 \pm 3.6$          |
| $10^{-5}$     | $92.2 \pm 0.8$          | $92.5 \pm 6.9$          |
| $10^{-6}$     | $68.9 \pm 6.8$          | $26.4 \pm 1.5$          |
| $10^{-7}$     | $3.8 \pm 3.0$           | $27.7 \pm 4.2$          |

**Table S7** The RCC achieved by incubation of  $^{212}\text{Bi}^{3+}$  1:1 0.1 M HCl: 0.1 M NaI with  $\text{H}_2\text{DOTS}$  and  $\text{H}_2\text{DOTP}$  under different ligand concentrations at pH 5.5 (0.8 M  $\text{NH}_4\text{OAc}$  pH 5.5) over 10 min at ambient temperature.

| Concentration | $\text{H}_2\text{DOTS}^{\text{a}}$ | $\text{H}_4\text{DOTP}^{\text{a}}$ | $\text{H}_4\text{DOTP}^{\text{b}}$ | $\text{H}_4\text{DOTA}^{\text{b}}$ |
|---------------|------------------------------------|------------------------------------|------------------------------------|------------------------------------|
| $10^{-3}$     | $97.5 \pm 2.5$                     | $91.8 \pm 2.3$                     |                                    |                                    |
| $10^{-4}$     | $96.3 \pm 2.0$                     | $96.6 \pm 1.5$                     | $92.9 \pm 5.6$                     | $61.0 \pm 7.3$                     |
| $10^{-5}$     | $95.0 \pm 3.8$                     | $94.4 \pm 2.2$                     | $87.2 \pm 11.8$                    | $15.6 \pm 6.7$                     |
| $10^{-6}$     | $20.0 \pm 1.6$                     | $14.5 \pm 12.0$                    | $89.3 \pm 7.2$                     | $5.1 \pm 4.6$                      |
| $10^{-7}$     | $15.5 \pm 4.4$                     | $4.4 \pm 3.0$                      | $85.0 \pm 5.2$                     |                                    |

<sup>a</sup>This work. <sup>b</sup>J. Simecek, P. Hermann, C. Seidl, F. Bruchertseifer, A. Morgenstern, H. J. Wester and J. Notni, Efficient formation of inert Bi-213 chelates by tetraphosphorus acid analogues of DOTA: towards improved alpha-therapeutics, *EJNMMI Res.*, 2018, **8**, 78. The difference in measured RCC values may be due to a difference in specific activity, but this was not calculated in either case.

**Table S8** The RCC achieved by incubation of  $^{212}\text{Pb}^{2+}$  with  $\text{H}_2\text{DOTS}$  at a ligand concentration of  $10^{-4}$  M at pH 5.5 (0.8 M  $\text{NH}_4\text{OAc}$  pH 5.5) and pH 7.4 (0.1 M HEPES pH 7.4) over 0 - 30 min at ambient temperature.

| Time | pH 5.5         | pH 7.4          |
|------|----------------|-----------------|
| 0    | $0.0 \pm 0.0$  | $0.0 \pm 0.0$   |
| 10   | $97.6 \pm 0.8$ | $100.0 \pm 0.0$ |
| 20   | $96.7 \pm 0.4$ | $100 \pm 0.0$   |
| 30   | $96.6 \pm 0.5$ | $100 \pm 0.0$   |

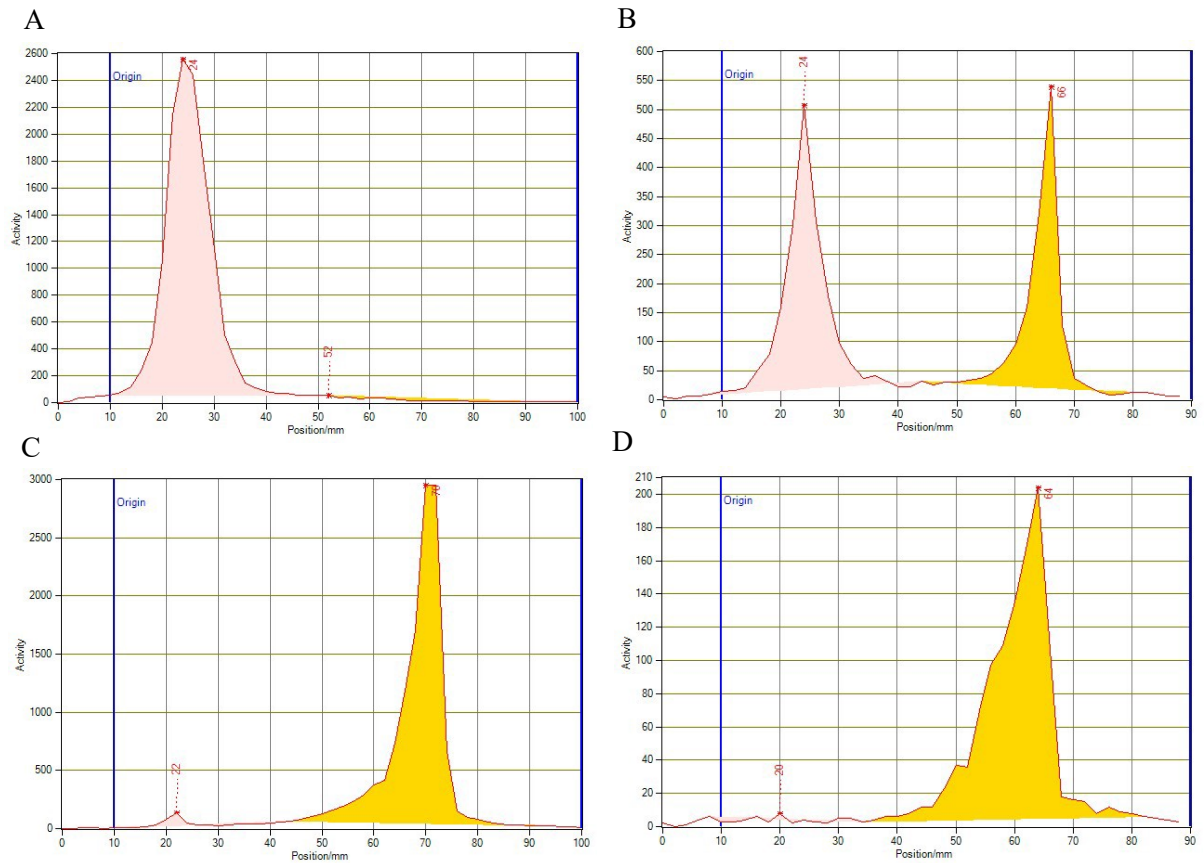

**Figure S22.** Representative iTLC chromatograms with a 50 mM EDTA mobile phase: A)  $[^{212}\text{Pb}][\text{Pb}(\text{H}_2\text{DOTS})]^{2+}$ ; B)  $[^{212}\text{Pb}][\text{Pb}(\text{H}_2\text{DOTS})]^{2+}$  and  $[^{212}\text{Pb}]\text{Pb}^{2+}$ ; C)  $[^{212}\text{Pb}]\text{Pb}^{2+}$  and; D)  $[^{212}\text{Pb}]\text{Pb}^{2+}$  after incubation in serum for 24 h.

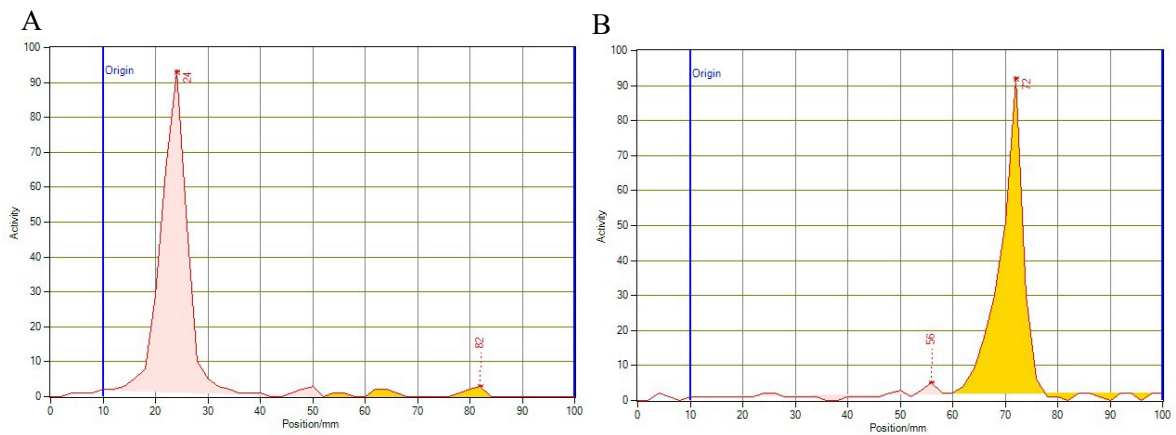

**Figure S23.** Representative iTLC chromatograms with a 50 mM EDTA mobile phase: A)  $[^{212}\text{Bi}][\text{Bi}(\text{DOTS})]^+$  and; B)  $[^{212}\text{Bi}]\text{Bi}^{3+}$ .
